# Supplementary material
Source: PubMed Central journal article supplement (PMC1924554)

no sucrose

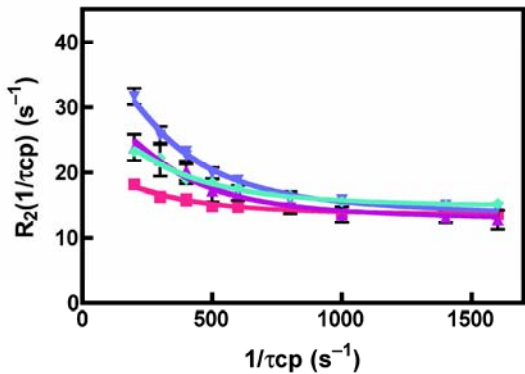

sucrose

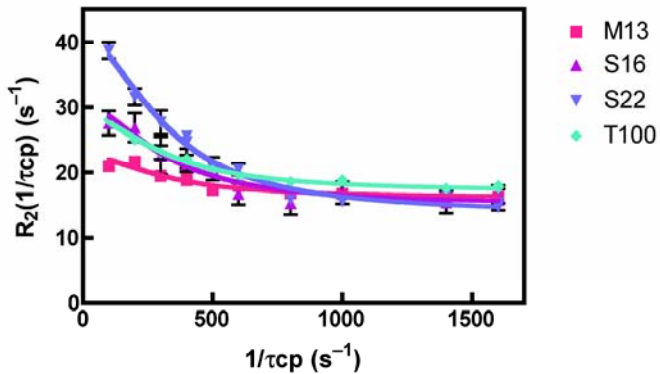

Supplement: pnas_0702551104_1.pdf [file pnas_0702551104_1.pdf]

D121A 4.8% D<sub>2</sub>O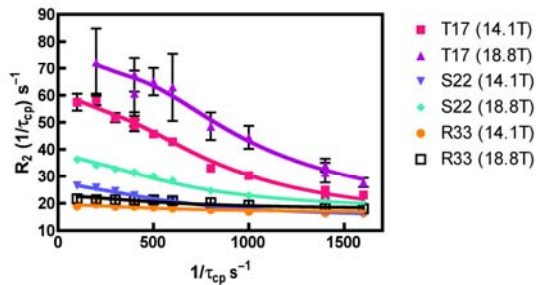D121A 52% D<sub>2</sub>O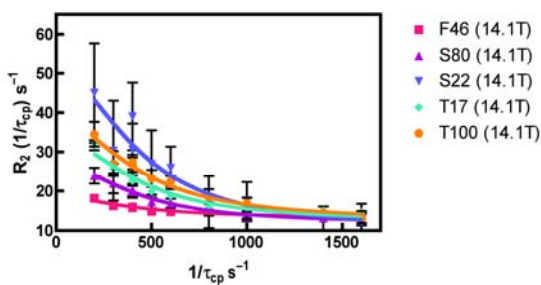D121A 4.8% D<sub>2</sub>O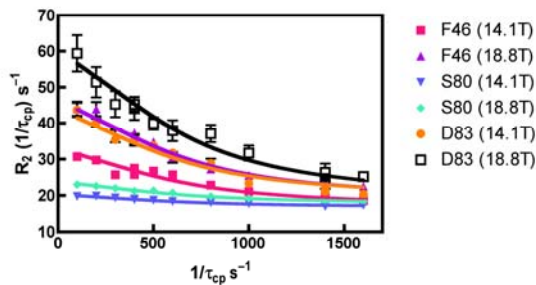D121A 52% D<sub>2</sub>O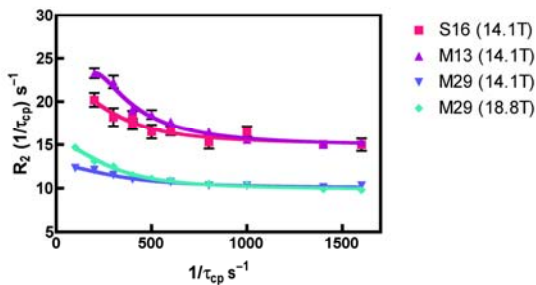D121A 4.8% D<sub>2</sub>O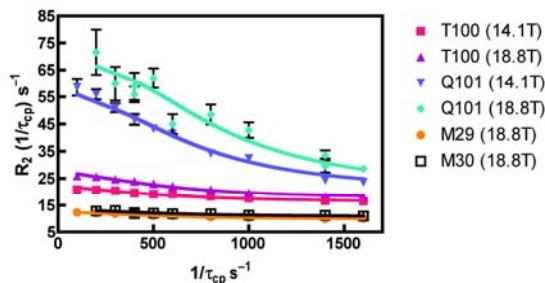D121A 98% D<sub>2</sub>O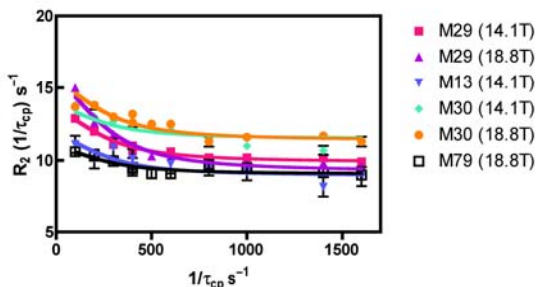

Supplement: pnas_0702551104_2.pdf [file pnas_0702551104_2.pdf]

# D121A proton inventory

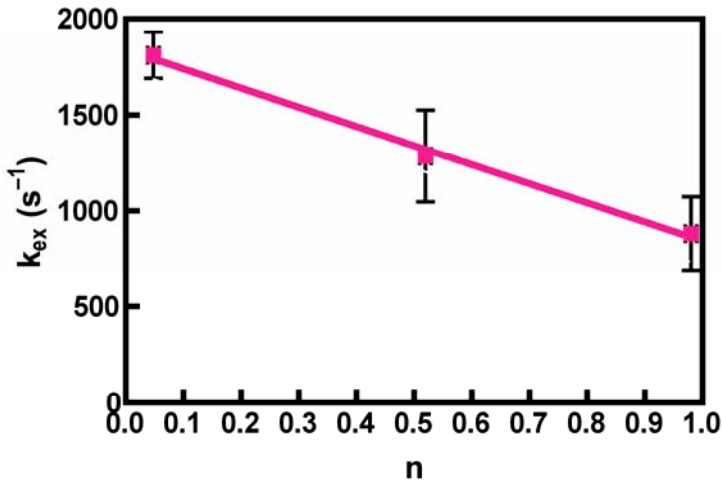

Supplement: pnas_0702551104_3.pdf [file pnas_0702551104_3.pdf]

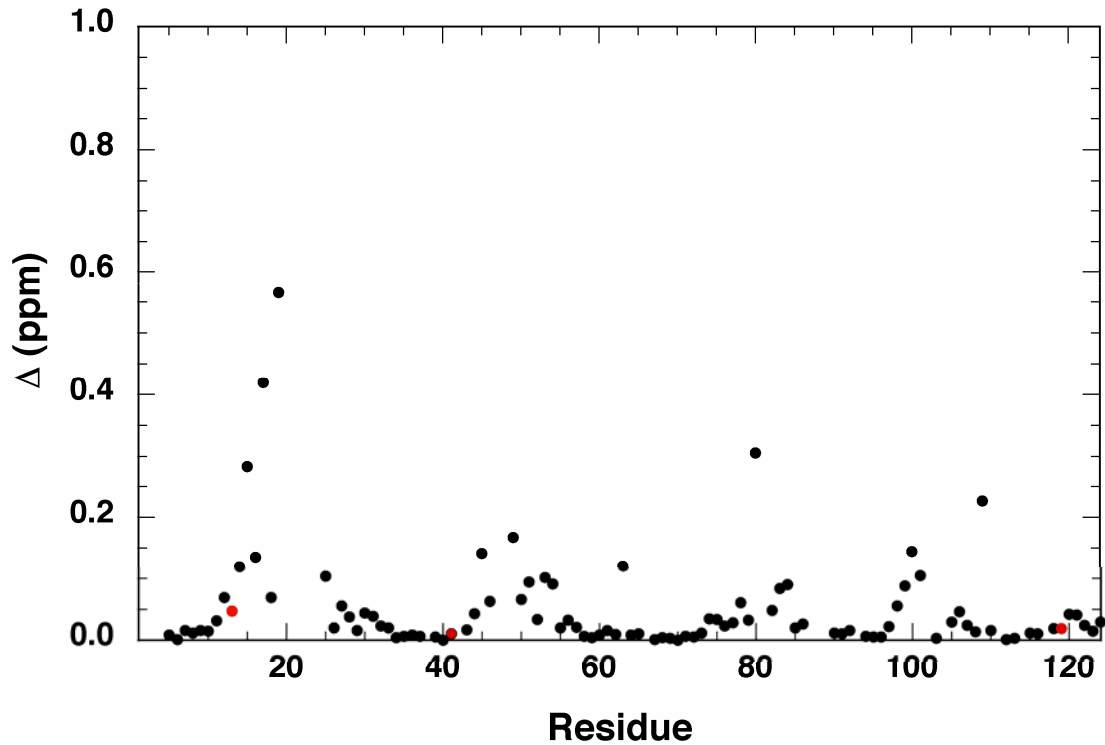

Supplement: pnas_0702551104_4.pdf [file pnas_0702551104_4.pdf]

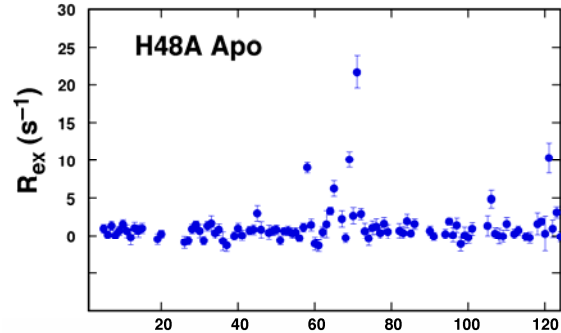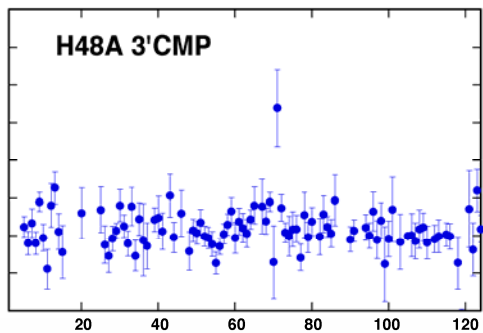

**Residue**

Supplement: pnas_0702551104_5.pdf [file pnas_0702551104_5.pdf]
